# Supplementary material for: Polyacrylonitrile/Aminated Polymeric Nanosphere Nanofibers as Efficient Adsorbents for Cr(VI) Removal
Source: MDPI journal article supplement (doi:10.3390/molecules27207133), 2022-10-21
Supplement: s1 [file s1]

# Supplementary data

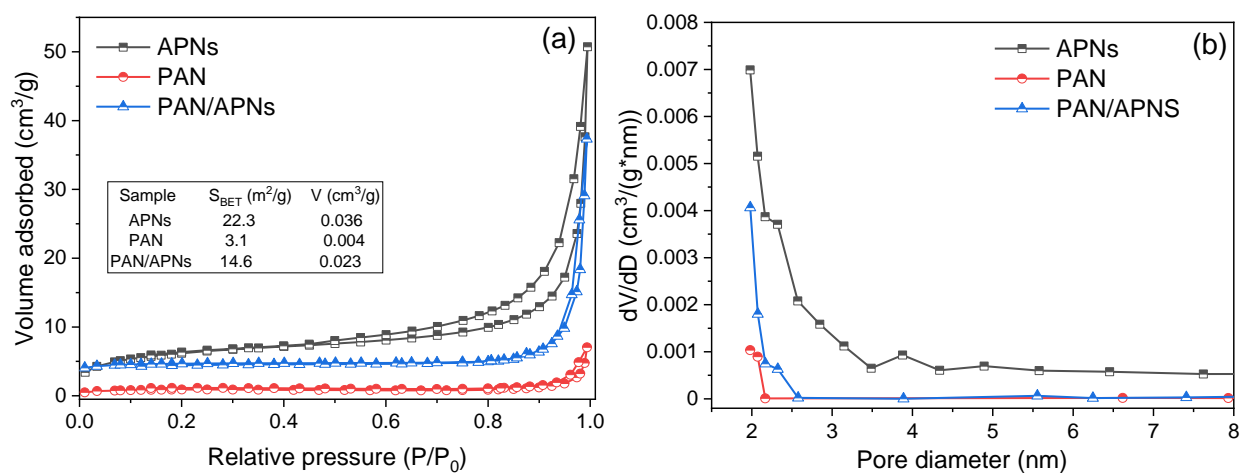

Figure S1. Nitrogen adsorption-desorption isotherms (a) and pore size distribution curves (b) of APNs, PAN and PAN/APNs.

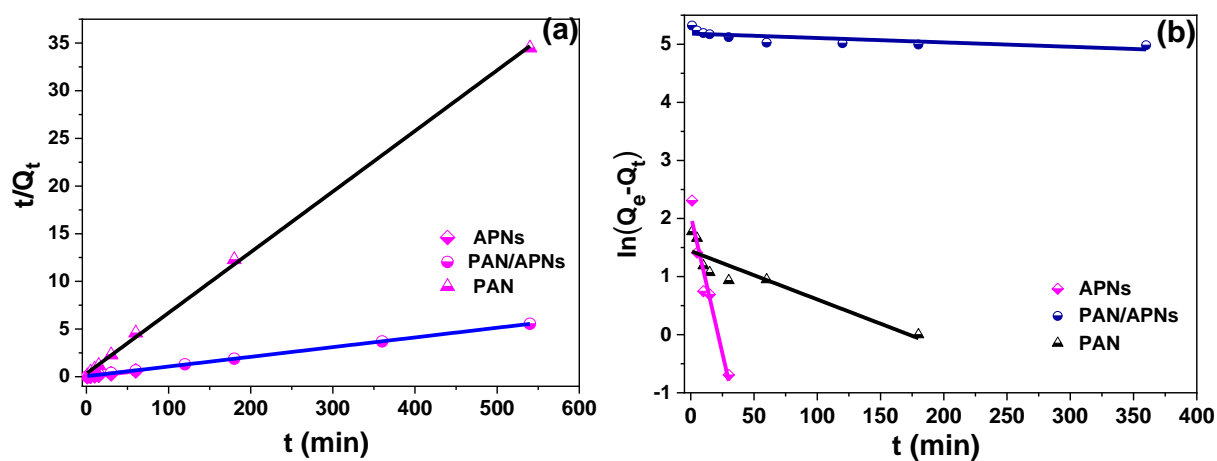

Figure S2. The fitting kinetic data of pseudo second order (a), pseudo first order (b).

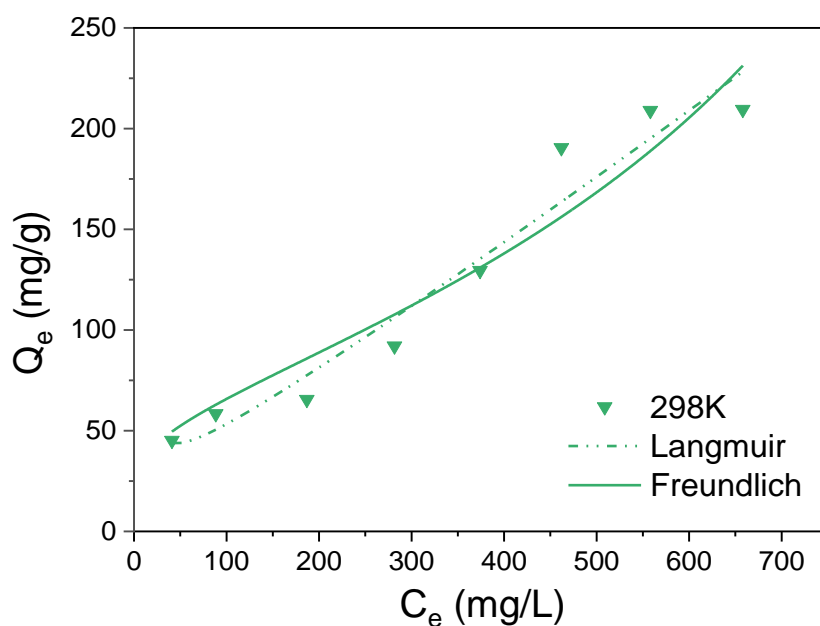

Figure S3. Langmuir and Freundlich isotherm models for Cr(VI) adsorption onto PAN. (pH = 2, adsorbent dose = 0.2 g/L).

Table S1. The pseudo second order and the first order model parameters

| Samples  | $Q_{exp}$<br>(mg/g) | Pseudo second order |                       |                     |        | Pseudo first order |                               |        |
|----------|---------------------|---------------------|-----------------------|---------------------|--------|--------------------|-------------------------------|--------|
|          |                     | $Q_{e2}$<br>(mg/g)  | $k_2$<br>(g/(mg min)) | $h$<br>(mg/(g min)) | $R^2$  | $Q_{e1}$<br>(mg/g) | $k_1$<br>(min <sup>-1</sup> ) | $R^2$  |
| APNs     | 98.3                | 98.6                | 0.043                 | 418.0               | 0.9999 | 150.1              | 0.095                         | 0.9198 |
| PAN/APNs | 97.3                | 98.3                | 0.002                 | 18.0                | 0.9998 | 178.3              | 0.001                         | 0.5026 |
| PAN      | 15.7                | 15.7                | 0.012                 | 3.0                 | 0.9992 | 4.2                | 0.008                         | 0.7972 |

Table S2. The parameters of the Langmuir model and Freundlich model

| Samples  | Temperature<br>(K) | Langmuir        |                 |        | Freundlich |        |
|----------|--------------------|-----------------|-----------------|--------|------------|--------|
|          |                    | $Q_m$<br>(mg/g) | $K_L$<br>(L/mg) | $R^2$  | $1/n$      | $R^2$  |
| APNs     | 298                | 698             | 0.323           | 0.9019 | 0.284      | 0.7215 |
|          | 308                | 781             | 0.290           | 0.9229 | 0.294      | 0.7760 |
|          | 318                | 922             | 0.255           | 0.9577 | 0.314      | 0.8182 |
| PAN/APNs | 298                | 556             | 0.022           | 0.9329 | 0.130      | 0.7294 |
|          | 308                | 667             | 0.021           | 0.9218 | 0.158      | 0.7570 |
|          | 318                | 800             | 0.030           | 0.9691 | 0.201      | 0.8368 |
| PAN      | 298                | 333             | 0.003           | 0.9735 | 0.595      | 0.8381 |
